# Supplementary material for: Premature ovarian aging in BRCA carriers: a prototype of systemic precocious aging?
Source: PubMed Central journal article supplement (PMC5882308; doi:10.18632/oncotarget.24638), 2018-03-23
Supplement: oncotarget-09-15931-s001.pdf [file oncotarget-09-15931-s001.pdf]

## Premature ovarian aging in *BRCA* carriers: a prototype of systemic precocious aging?

### SUPPLEMENTARY MATERIALS

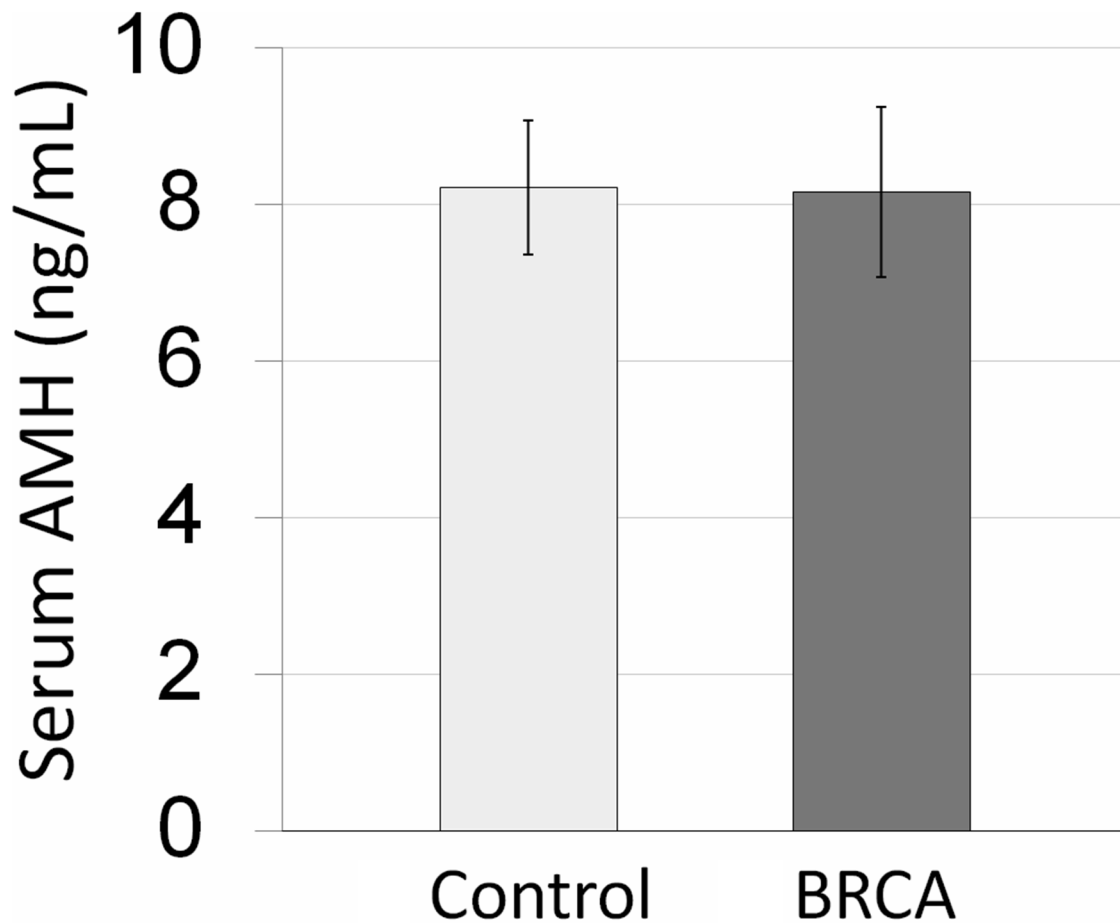

**Supplementary Figure 1: The level of anti-Mullerian hormone (AMH) in the serum of male *BRCA* mutation carriers.** AMH concentration in the serum of male non-carriers (control; light gray bars) and *BRCA* mutation carriers (BRCA; dark gray bars). Each bar is mean  $\pm$  SEM.
